# Supplementary material for: Treatment of intraoperative hypotension with cafedrine/theodrenaline versus ephedrine: A prospective, national, multicenter, non-interventional study—the HYPOTENS trial
Source: PubMed Central journal article supplement (PMC8026467; doi:10.1007/s00101-020-00877-5), 2020-11-10
Supplement: 101_2020_877_MOESM1_ESM.pdf [file 101_2020_877_MOESM1_ESM.pdf]

### Zusatzmaterial zum Beitrag

Eberhart L., Geldner G., Kowark A. et al. (2020) "Treatment of intraoperative hypotension with cafedrine/theodrenaline versus ephedrine in patients receiving general anesthesia in HYPOTENS, a prospective, national, multi-center, non-interventional study" aus *Der Anaesthetist*.

The article and supplementary material are available at [www.springermedizin.de](http://www.springermedizin.de). Please enter the title of the article in the search field. You will find the additional material under "Ergänzende Inhalte" in the article.

### Supplementary Figure 1. DBP measured before the operation, at diagnosis of hypotension and during the first 15 min after application of either C/T or E.

Shown are the mean (diamonds), median (dash), 25<sup>th</sup>/75<sup>th</sup> percentiles (box), 1.5\*IQR (whiskers), and outliers (dots). Horizontal grey lines indicate the DBP target as defined by the treating physician.

C/T, Cafedrine/theodrenaline; DBP, Diastolic blood pressure; E, Ephedrine; IQR, Interquartile range; OP, Operation.

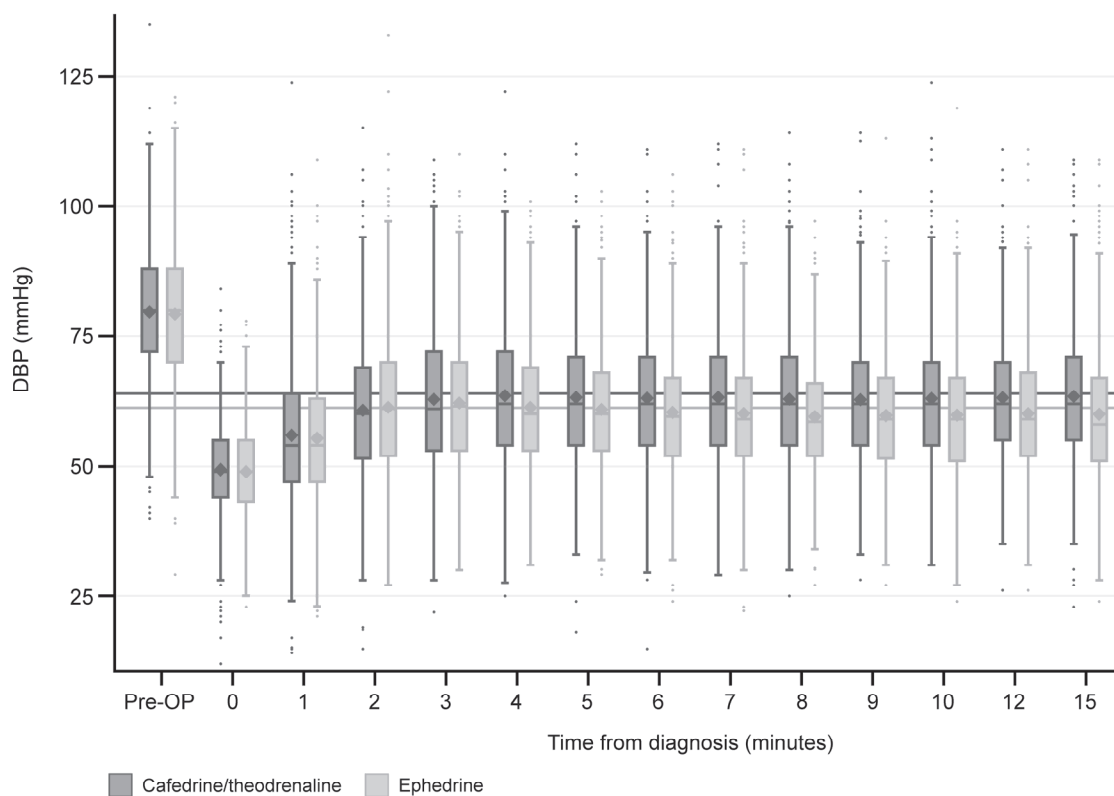

## Supplementary Figure 2. Change in mean heart rate from diagnosis of hypotension in different C/T and E dosing groups.

Dose groups are defined as low (C/T: <0.5479 mg/kg; E: <0.1111 mg/kg), medium-low (C/T:  $\geq$ 0.5479 to <0.6849 mg/kg; E:  $\geq$ 0.1111 to <0.1351 mg/kg), medium-high (C/T:  $\geq$ 0.6849 to <0.9615 mg/kg; E:  $\geq$ 0.1351 to <0.1829 mg/kg) and high (C/T:  $\geq$ 0.9615 mg/kg; E:  $\geq$ 0.1829 mg/kg).

Category boundaries were derived as PP population percentiles (p25%, p50%, p75%) in order to provide similar group size for all 4 categories.

C/T, Cafedrine/theodrenaline; E, Ephedrine; HR, Heart rate; PP, Per-protocol.

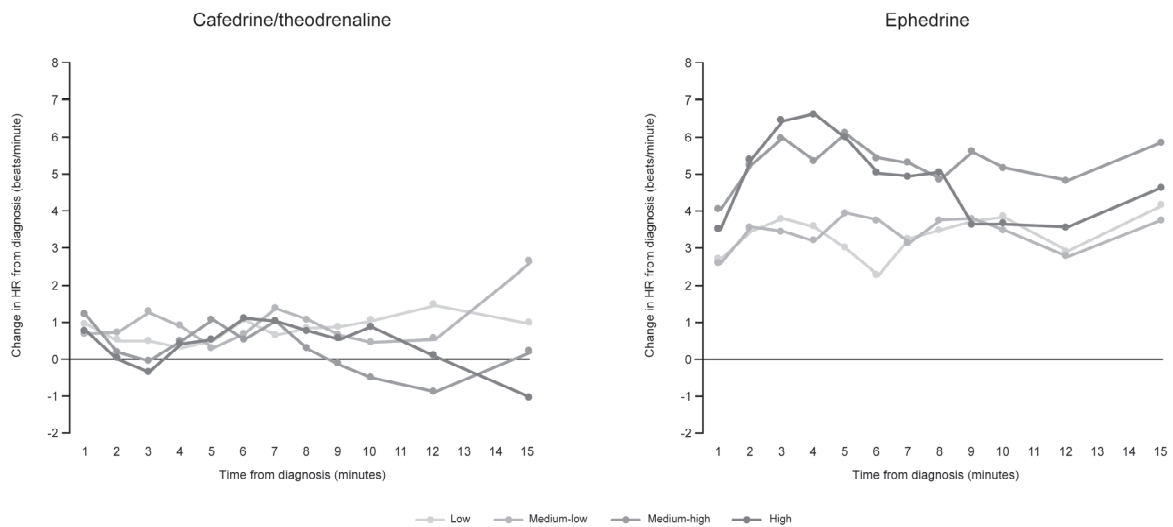

**Supplementary Table 1. Physician experience and satisfaction with C/T and E.**

| <b>n, (%)</b>                                  | <b>C/T<br/>(n=749)</b> | <b>E<br/>(n=747)</b> |
|------------------------------------------------|------------------------|----------------------|
| <b><i>Experience</i></b>                       |                        |                      |
| ≤3 months                                      | 26 (3.5)               | 21 (2.8)             |
| >3 months                                      | 723 (96.5)             | 726 (97.2)           |
| <b><i>Satisfaction – Rapidity of onset</i></b> |                        |                      |
| Very good or good*                             | 566 (75.6)             | 525 (70.3)           |
| <b><i>Satisfaction – Precision</i></b>         |                        |                      |
| Very good or good*                             | 481 (64.2)             | 424 (56.8)           |

\*Physicians evaluating the study drug with a score of 1 (very good) or 2 (good).  
C/T, Cafedrine/theodrenaline; E, Ephedrine.
